# Supplementary material
Source: Research Square preprint supplement (doi:10.21203/rs.3.rs-9537415/v1)
Supplement: Supplementary file 1 [file b17c4889841e775174d95d42.pdf]

## Supplementary Material

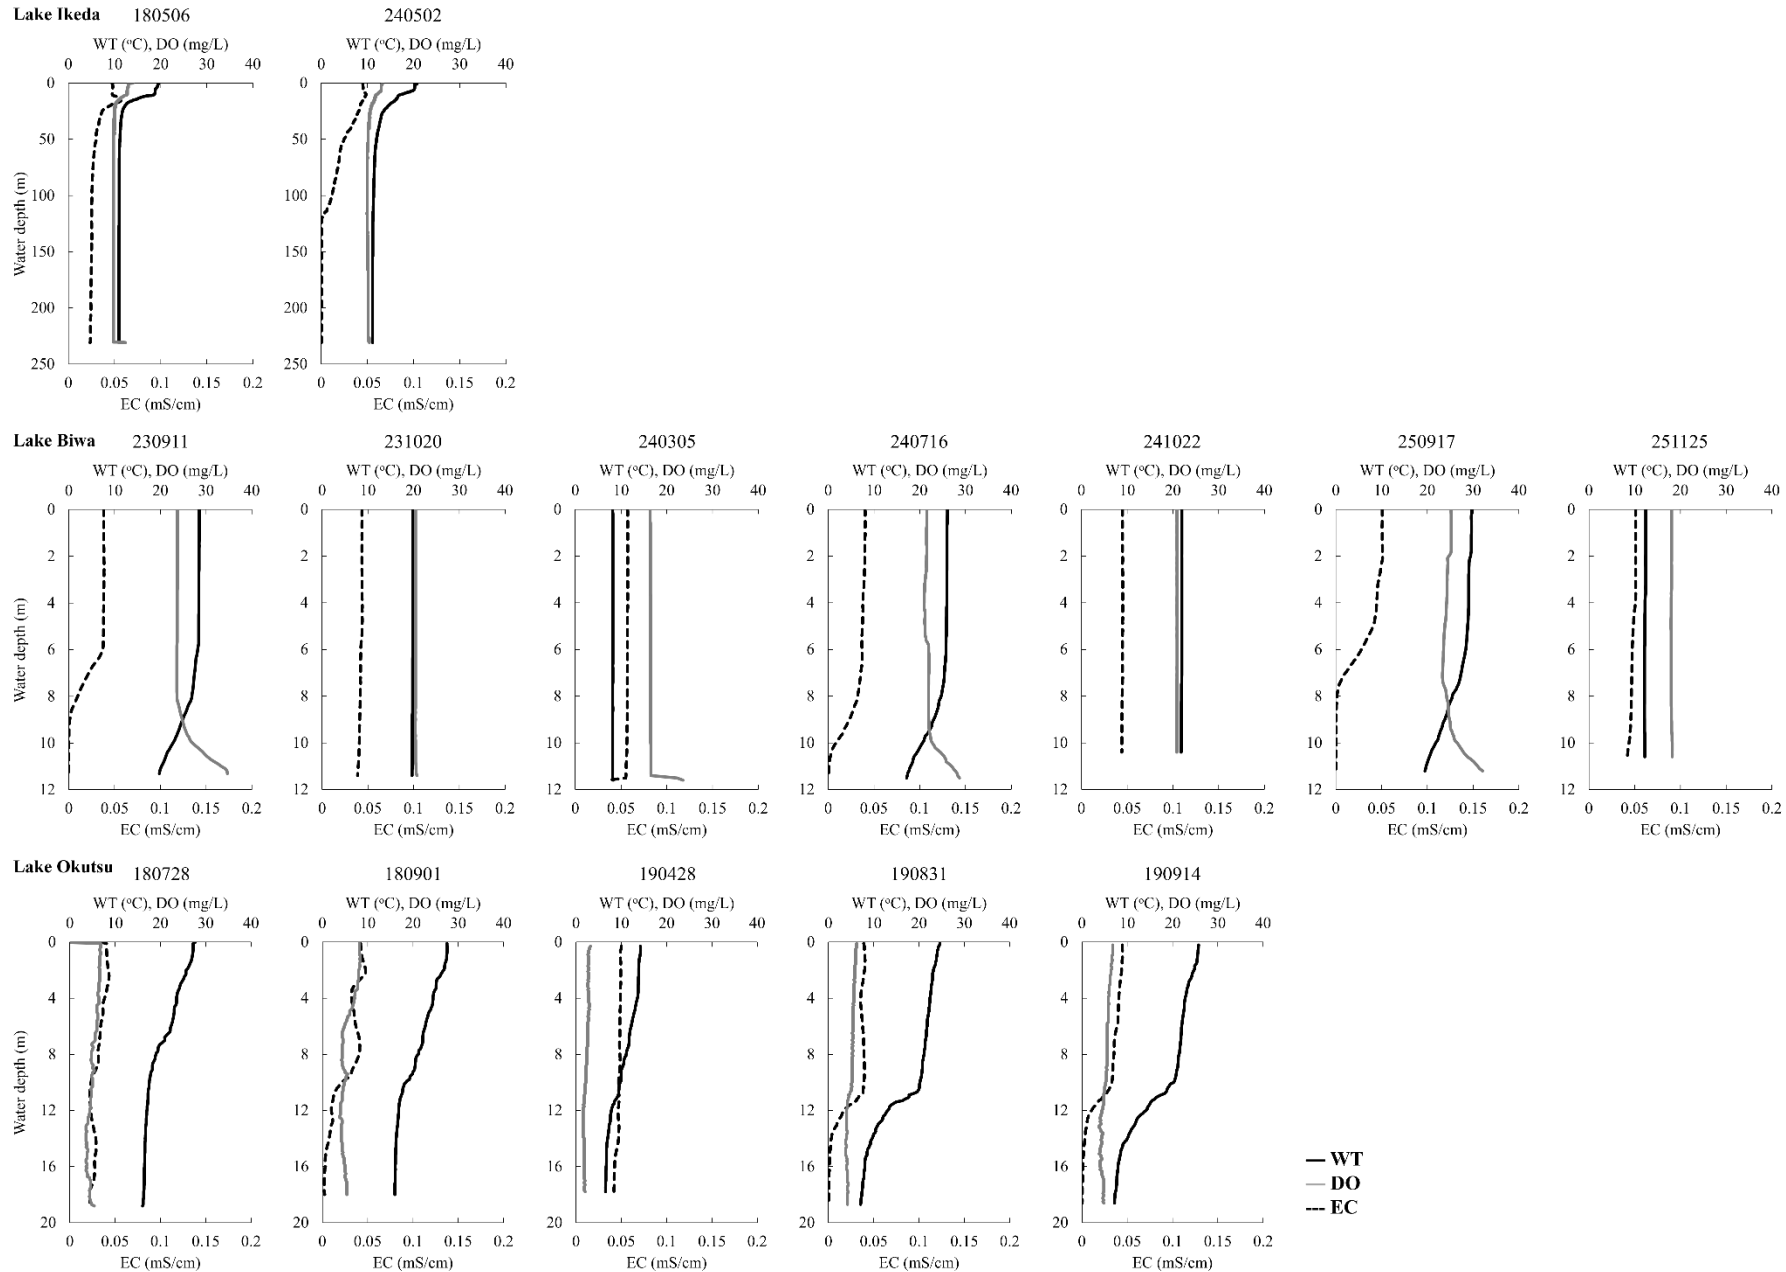

Fig. S1 Vertical profiles of water quality parameters—water temperature (WT), electrical conductivity (EC), and dissolved oxygen (DO)—in the water columns

of Lake Ikeda (May 2018 and May 2024), the South Basin of Lake Biwa (multiple sampling dates, 2023–2025), and Lake Okutsu (2018–2019). Note the development of hypolimnetic anoxia ( $\text{DO} \approx 0 \text{ mg L}^{-1}$ ) during stratification periods at all three study sites. These profiles demonstrate the contrasting redox environments associated with circulation and stratification seasons at each lake.

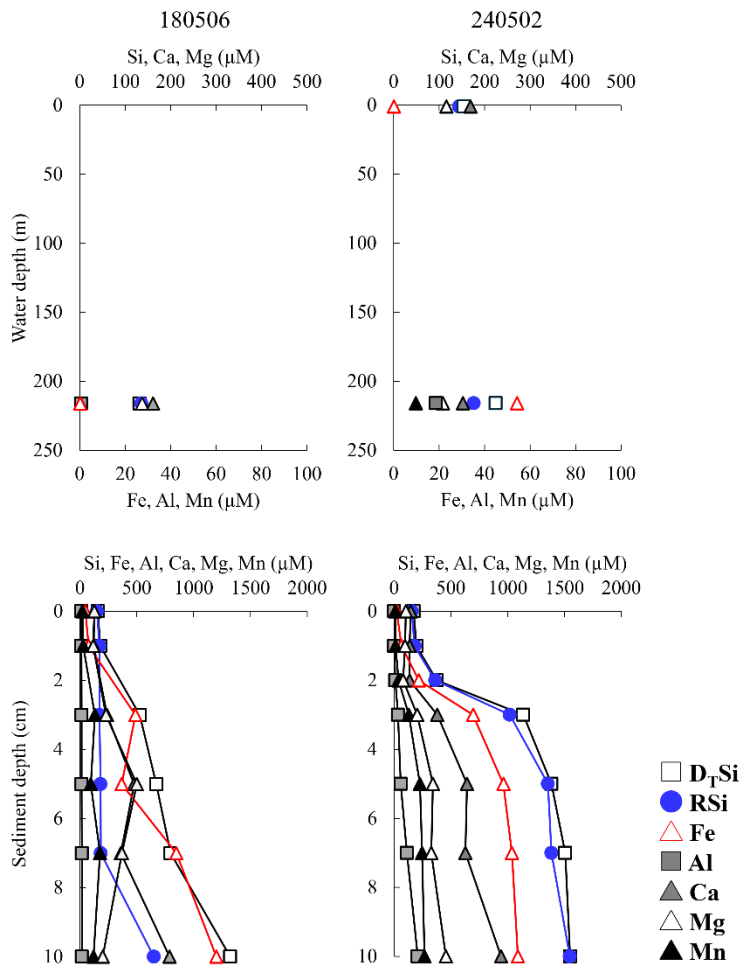

Fig. S2 Vertical profiles of dissolved substances— $D_T\text{Si}$ ,  $\text{RSi}$ , iron (Fe), aluminum (Al), calcium (Ca), magnesium (Mg), and manganese (Mn)—in the water column and sediment pore water of Lake Ikeda in May 2018 (oxic) and May 2024 (anoxic). Note the marked increase in all dissolved species, particularly  $D_T\text{Si}$ , iron, and manganese, in pore water under anoxic conditions in 2024 relative to the uniform, low-concentration profiles observed in 2018. In May 2024,  $D_T\text{Si}$  in pore water showed a strong positive correlation with iron ( $R^2 = 0.96$ ) and manganese ( $R^2 = 0.92$ ; Table S3).

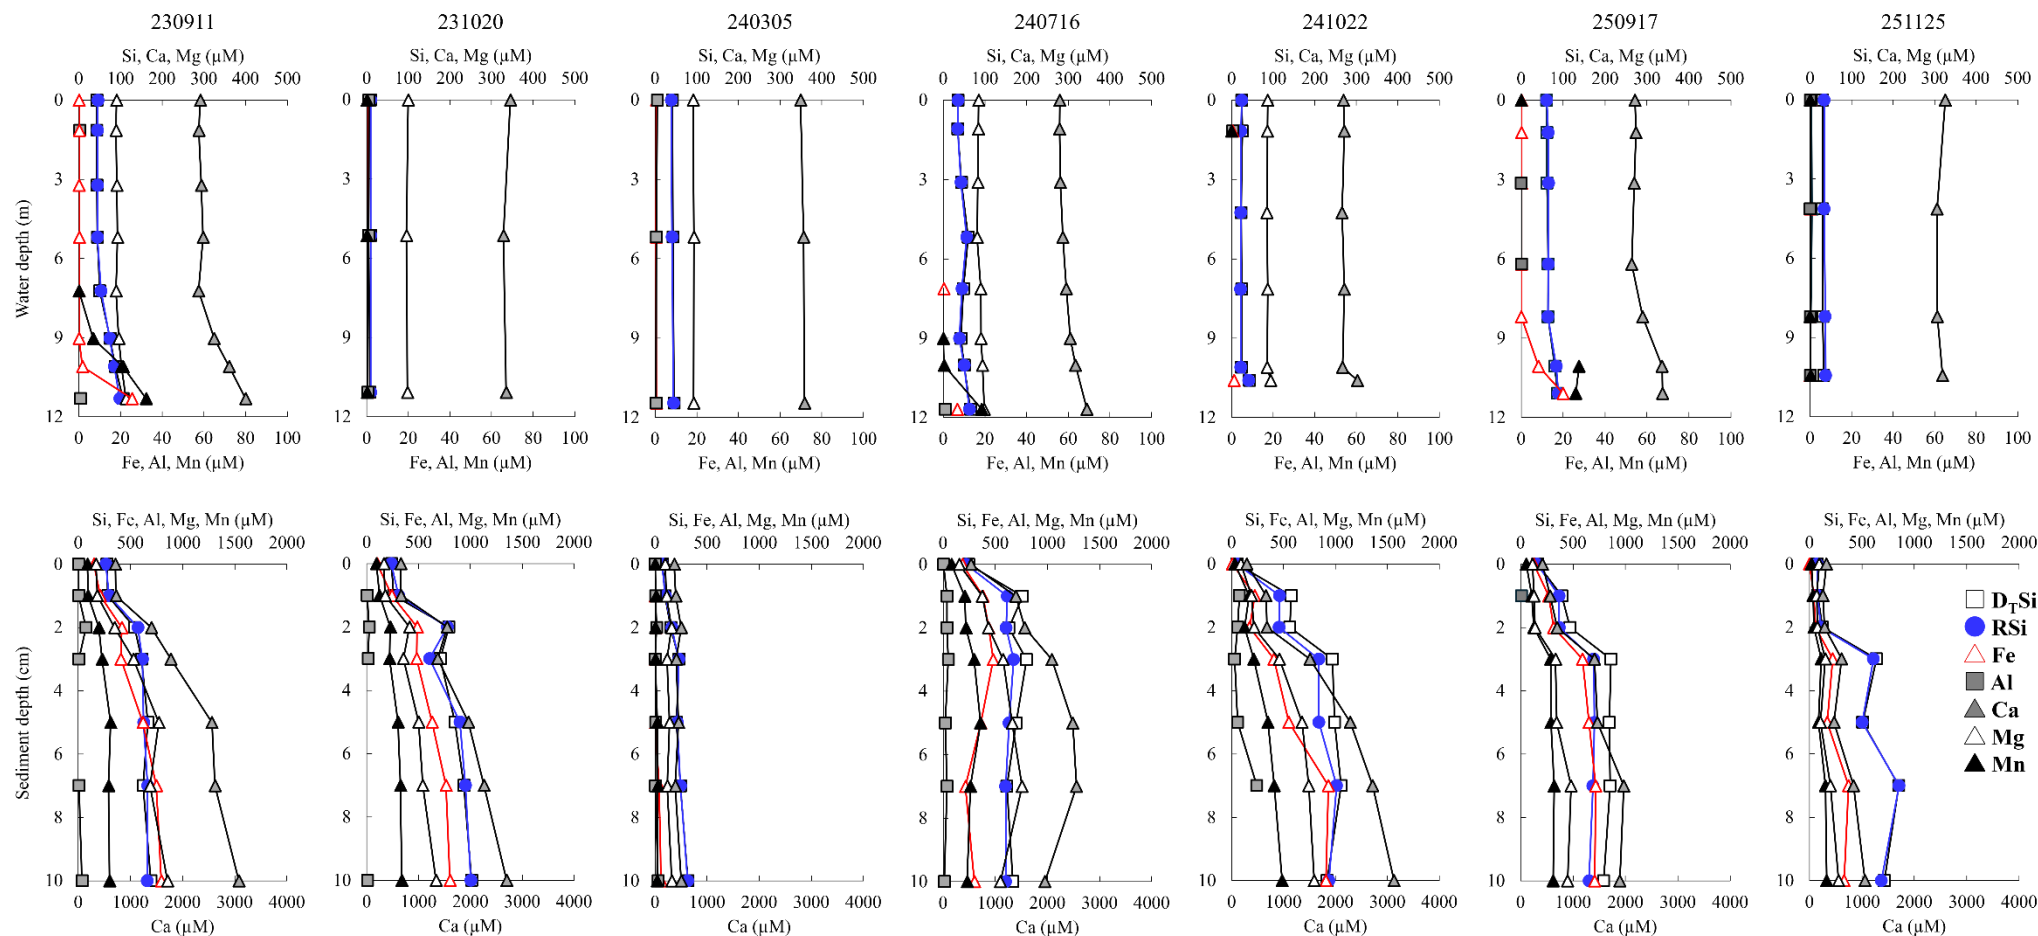

Fig. S3 Vertical profiles of dissolved substances— $D_T$ Si, RSi, iron (Fe), aluminum (Al), calcium (Ca), magnesium (Mg), and manganese (Mn)—in the water column and sediment pore water of the South Basin of Lake Biwa during the study period (2023–2025). Note the seasonal contrast between stratification periods (elevated  $D_T$ Si, iron, and manganese; pronounced  $D_P$ Si) and circulation periods (suppressed concentrations; near-absence of  $D_P$ Si in surface porewater). Correlation coefficients between  $D_T$ Si and co-dissolved metals are provided in Table S5.

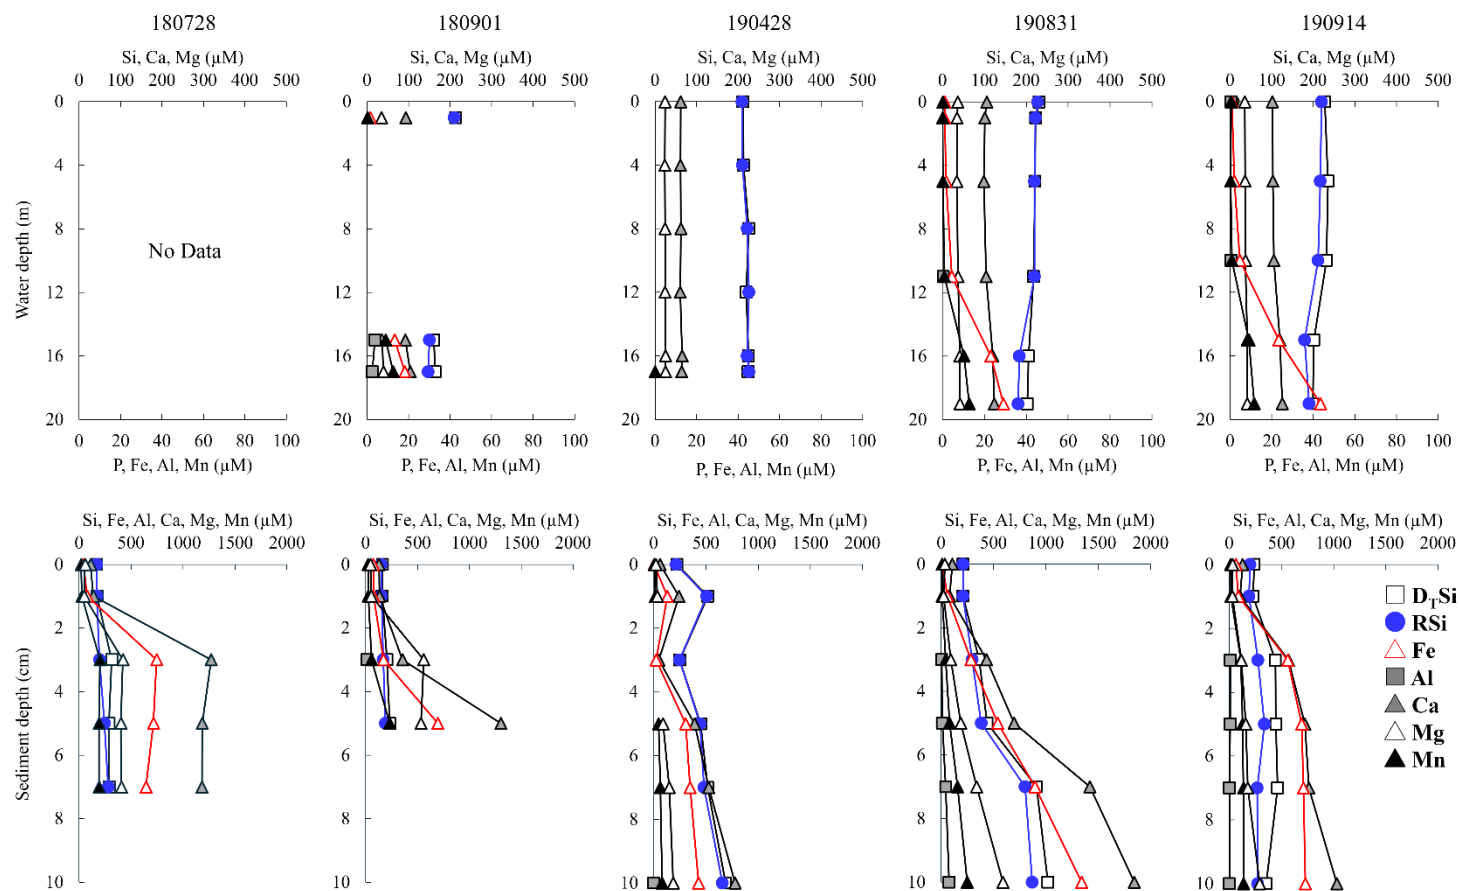

Fig. S4 Vertical profiles of dissolved substances— $D_T$ Si, RSi, iron (Fe), aluminum (Al), calcium (Ca), magnesium (Mg), and manganese (Mn)—in the water column and sediment pore water of Lake Okutsu during the study period (2018–2019). Note the rapid increases in iron and manganese in the anoxic hypolimnion during summer stratification (September 2018, August 2019, September 2019), concurrent with elevated  $D_T$ Si concentrations;  $D_P$ Si accounted for up to 42% of  $D_T$ Si during peak stratification (Table S6). In sediment pore water under anoxic conditions, dissolved iron and manganese reached 12–1341  $\mu$ M and 9–248  $\mu$ M, respectively.

Table S1 Dissolved substance data for Lake Ikeda (May 2018 and May 2024), including D<sub>T</sub>Si, RSi, D<sub>P</sub>Si, and dissolved metal concentrations in water column and sediment pore water.

| Lake Ikeda  |                     | Depth | RSi     | D <sub>T</sub> Si | Fe      | Al                         | Ca     | Mg     | Mn     |
|-------------|---------------------|-------|---------|-------------------|---------|----------------------------|--------|--------|--------|
|             |                     |       |         |                   |         | ( $\mu\text{mol L}^{-1}$ ) |        |        |        |
| May 6, 2018 | water depth (m)     | 1     | 131.42  | 123.70            | <DL     | 0.53                       | 159.94 | 129.02 | <DL    |
|             |                     | 216   | 135.77  | 131.53            | 0.28    | 0.57                       | 161.40 | 137.09 | 0.38   |
|             | Sediment depth (cm) | 0     | 148.81  | 155.36            | 46.83   | <DL                        | 125.70 | 125.86 | 20.22  |
|             |                     | 1     | 170.54  | 177.16            | 76.28   | <DL                        | 120.61 | 115.95 | 28.24  |
|             |                     | 3     | 170.54  | 525.30            | 487.85  | <DL                        | 237.89 | 227.30 | 129.74 |
|             |                     | 5     | 179.24  | 671.04            | 367.17  | <DL                        | 474.75 | 500.59 | 95.46  |
|             |                     | 7     | 181.84  | 797.93            | 847.34  | <DL                        | 359.00 | 367.73 | 174.89 |
|             |                     | 10    | 648.68  | 1320.46           | 1200.51 | <DL                        | 787.94 | 199.16 | 119.11 |
| May 2, 2024 | water depth (m)     | 1     | 143.74  | 154.18            | 0.08    | <DL                        | 169.09 | 115.57 | <DL    |
|             |                     | 231   | 176.17  | 224.20            | 54.27   | 18.49                      | 152.44 | 108.26 | 9.76   |
|             | Sediment depth (cm) | 0     | 155.54  | 171.39            | 22.49   | 0.34                       | 145.46 | 102.96 | 8.86   |
|             |                     | 1     | 180.43  | 196.54            | 65.93   | 0.56                       | 135.47 | 96.03  | 13.21  |
|             |                     | 2     | 363.47  | 374.25            | 218.19  | 11.10                      | 135.49 | 79.92  | 38.16  |
|             |                     | 3     | 1017.31 | 1136.15           | 695.01  | 32.93                      | 379.09 | 202.98 | 130.06 |
|             |                     | 5     | 1353.51 | 1385.32           | 961.79  | 56.78                      | 642.26 | 340.82 | 226.58 |
|             |                     | 7     | 1384.16 | 1506.32           | 1037.51 | 112.94                     | 628.00 | 327.72 | 245.73 |
|             |                     | 10    | 1545.74 | 1548.33           | 1089.45 | 207.47                     | 941.70 | 456.56 | 266.23 |

Table S2 Coefficients of determination ( $R^2$ ) for linear regressions between  $D_TSi$  and co-dissolved substances in Lake Ikeda pore water under oxic and anoxic conditions.

| Lake Ikeda | RSi  | $D_TSi$ | Ca   | Fe   | Al   | Mn   | Mg |
|------------|------|---------|------|------|------|------|----|
| RSi        | 1    |         |      |      |      |      |    |
| $D_TSi$    | 0.89 | 1       |      |      |      |      |    |
| Ca         | 0.80 | 0.93    | 1    |      |      |      |    |
| Fe         | 0.76 | 0.96    | 0.91 | 1    |      |      |    |
| Al         | 0.83 | 0.80    | 0.94 | 0.82 | 1    |      |    |
| Mn         | 0.83 | 0.92    | 0.84 | 0.89 | 0.86 | 1    |    |
| Mg         | 0.47 | 0.65    | 0.71 | 0.62 | 0.92 | 0.76 | 1  |

Table S3 Dissolved substance data for the South Basin of Lake Biwa (2023–2025), including  $D_TSi$ ,  $RSi$ ,  $D_PSi$ , and dissolved metal concentrations in water column and sediment pore water.

| Lake Biwa           |                     | Depth            | $RSi$                    | $D_TSi$ | Fe      | Al     | Ca      | Mg     | Mn     |       |
|---------------------|---------------------|------------------|--------------------------|---------|---------|--------|---------|--------|--------|-------|
|                     |                     |                  | $(\mu\text{mol L}^{-1})$ |         |         |        |         |        |        |       |
| September 11, 2023  | water depth (m)     | 0                | 45.87                    | 43.34   | 0.15    | <DL    | 291.49  | 90.49  | <DL    |       |
|                     |                     | 1                | 44.82                    | 42.71   | 0.16    | 0.47   | 287.61  | 89.33  | <DL    |       |
|                     |                     | 3                | 44.82                    | 43.09   | 0.10    | <DL    | 293.65  | 91.23  | <DL    |       |
|                     |                     | 5                | 44.29                    | 44.49   | 0.16    | <DL    | 297.94  | 93.07  | <DL    |       |
|                     |                     | 7                | 53.21                    | 50.20   | 0.15    | <DL    | 287.18  | 89.50  | 0.07   |       |
|                     |                     | 9                | 74.19                    | 75.10   | 0.05    | <DL    | 324.43  | 95.99  | 6.93   |       |
|                     |                     | 10               | 85.20                    | 87.34   | 1.77    | <DL    | 360.21  | 102.18 | 21.22  |       |
|                     |                     | 11               | 98.31                    | 106.23  | 25.54   | 0.75   | 400.05  | 113.36 | 32.24  |       |
|                     | Sediment depth (cm) | 0                | 262.46                   | 273.64  | 149.84  | 0.51   | 707.18  | 168.45 | 87.81  |       |
|                     |                     | 1                | 294.14                   | 281.51  | 209.72  | 4.48   | 722.21  | 181.09 | 92.90  |       |
|                     |                     | 2                | 570.05                   | 540.21  | 415.86  | 73.77  | 1400.75 | 347.63 | 196.69 |       |
|                     |                     | 3                | 614.31                   | 605.71  | 407.50  | 4.76   | 1773.95 | 528.31 | 228.35 |       |
|                     |                     | 5                | 625.47                   | 666.53  | 618.67  | <DL    | 2560.88 | 771.30 | 309.80 |       |
|                     |                     | 7                | 663.23                   | 621.68  | 746.94  | 6.02   | 2618.50 | 686.94 | 289.73 |       |
|                     |                     | 10               | 659.49                   | 694.05  | 794.44  | 34.54  | 3077.31 | 855.69 | 299.93 |       |
|                     |                     | October 20, 2023 | water depth (m)          | 0       | 8.35    | 8.82   | 0.50    | 1.09   | 345.50 | 99.83 |
|                     | 5                   |                  |                          | 9.42    | 9.50    | 0.65   | 0.97    | 328.56 | 95.28  | 0.11  |
| 11                  | 7.28                |                  |                          | 7.78    | 0.45    | 0.42   | 335.22  | 97.74  | 0.19   |       |
| Sediment depth (cm) | 0                   |                  | 236.26                   | 239.66  | 100.98  | <DL    | 656.11  | 165.70 | 93.09  |       |
|                     | 1                   |                  | 305.98                   | 257.31  | 240.91  | 5.03   | 660.15  | 176.77 | 122.62 |       |
|                     | 2                   |                  | 775.24                   | 791.58  | 486.14  | 23.38  | 1549.74 | 412.39 | 227.00 |       |
|                     | 3                   |                  | 605.90                   | 709.51  | 480.28  | 14.07  | 1367.43 | 352.88 | 219.78 |       |
|                     | 5                   |                  | 898.07                   | 851.14  | 630.05  | <DL    | 1959.04 | 499.56 | 300.90 |       |
|                     | 7                   |                  | 951.11                   | 936.98  | 764.75  | <DL    | 2261.59 | 539.93 | 325.78 |       |
|                     | 10                  |                  | 1004.21                  | 1010.82 | 802.83  | 6.82   | 2696.23 | 668.13 | 336.61 |       |
| March 5, 2024       | water depth (m)     | 0                | 38.71                    | 41.06   | 0.55    | 1.05   | 349.24  | 91.43  | <DL    |       |
|                     |                     | 5                | 40.81                    | 42.71   | 0.42    | 0.60   | 355.99  | 92.91  | <DL    |       |
|                     |                     | 11               | 43.97                    | 45.52   | 0.54    | 0.45   | 358.86  | 92.50  | <DL    |       |
|                     | Sediment depth (cm) | 0                | 68.16                    | 70.72   | 0.46    | 0.66   | 368.35  | 95.75  | 0.10   |       |
|                     |                     | 1                | 97.30                    | 95.25   | 1.20    | 4.51   | 394.38  | 110.32 | 9.69   |       |
|                     |                     | 2                | 158.98                   | 151.26  | 7.32    | 14.79  | 502.54  | 158.14 | 3.68   |       |
|                     |                     | 3                | 226.70                   | 230.29  | 0.86    | 1.19   | 405.27  | 113.82 | 2.38   |       |
|                     |                     | 5                | 212.12                   | 205.71  | 1.92    | 4.78   | 449.14  | 137.74 | 20.89  |       |
|                     |                     | 7                | 242.69                   | 244.13  | 38.04   | 3.61   | 387.51  | 117.58 | 25.64  |       |
|                     |                     | 10               | 312.02                   | 315.45  | 57.59   | 29.11  | 501.97  | 160.58 | 19.59  |       |
| July 16, 2024       | water depth (m)     | 0                | 35.04                    | 35.47   | <DL     | <DL    | 279.94  | 84.77  | <DL    |       |
|                     |                     | 1                | 34.55                    | 34.38   | <DL     | <DL    | 279.14  | 84.07  | <DL    |       |
|                     |                     | 3                | 42.47                    | 43.38   | <DL     | <DL    | 280.74  | 82.67  | <DL    |       |
|                     |                     | 5                | 56.35                    | 59.82   | <DL     | <DL    | 286.95  | 81.33  | <DL    |       |
|                     |                     | 7                | 44.95                    | 48.10   | 0.23    | <DL    | 295.45  | 90.32  | <DL    |       |
|                     |                     | 9                | 39.01                    | 42.32   | <DL     | <DL    | 304.95  | 90.56  | 0.02   |       |
|                     |                     | 10               | 49.91                    | 50.19   | <DL     | <DL    | 317.45  | 94.07  | 0.40   |       |
|                     |                     | 12               | 62.79                    | 64.72   | 6.71    | 0.86   | 344.89  | 98.70  | 18.44  |       |
|                     | Sediment depth (cm) | 0                | 221.30                   | 243.58  | 185.29  | 3.04   | 528.97  | 152.94 | 79.19  |       |
|                     |                     | 1                | 615.22                   | 762.22  | 382.69  | 37.10  | 1396.07 | 376.11 | 206.24 |       |
|                     |                     | 2                | 604.61                   | 630.19  | 437.10  | 37.64  | 1565.09 | 435.34 | 218.26 |       |
|                     |                     | 3                | 676.64                   | 800.06  | 479.60  | 48.09  | 2088.06 | 576.58 | 296.76 |       |
|                     |                     | 5                | 631.88                   | 699.21  | 360.05  | 20.22  | 2485.58 | 662.67 | 358.21 |       |
|                     |                     | 7                | 599.21                   | 610.61  | 213.54  | 36.05  | 2559.49 | 756.53 | 261.72 |       |
| 10                  | 599.16              | 669.20           | 299.22                   | 9.97    | 1952.85 | 549.92 | 230.83  |        |        |       |

|                     |                     |                     |         |        |        |         |         |        |        |
|---------------------|---------------------|---------------------|---------|--------|--------|---------|---------|--------|--------|
| October 22, 2024    | water depth (m)     | 0                   | 24.51   | 24.73  | <DL    | <DL     | 269.74  | 87.00  | <DL    |
|                     |                     | 1                   | 22.44   | 25.74  | 0.55   | 0.56    | 271.08  | 86.50  | 0.10   |
|                     |                     | 4                   | 22.44   | 23.20  | <DL    | <DL     | 265.89  | 85.04  | <DL    |
|                     |                     | 7                   | 21.92   | 25.01  | <DL    | <DL     | 271.24  | 86.86  | <DL    |
|                     |                     | 10                  | 22.44   | 24.04  | <DL    | <DL     | 267.25  | 85.75  | <DL    |
|                     |                     | 11                  | 41.56   | 43.47  | 1.21   | <DL     | 303.11  | 94.21  | <DL    |
|                     |                     | Sediment depth (cm) | 0       | 50.86  | 53.94  | 8.69    | <DL     | 294.31 | 90.31  |
|                     | 1                   | 462.58              | 574.16  | 223.88 | 74.81  | 661.41  | 192.43  | 168.48 |        |
|                     | 2                   | 458.72              | 561.43  | 173.85 | 57.65  | 682.05  | 215.20  | 126.18 |        |
|                     | 3                   | 839.88              | 970.61  | 409.00 | 30.37  | 1509.30 | 461.34  | 213.04 |        |
|                     | 5                   | 840.36              | 990.77  | 550.53 | 57.46  | 2284.20 | 678.19  | 350.74 |        |
|                     | 7                   | 1010.82             | 1053.59 | 931.24 | 241.56 | 2715.17 | 742.88  | 410.21 |        |
|                     | 10                  | 935.66              | 919.26  | 909.14 | <DL    | 3129.20 | 795.34  | 486.72 |        |
|                     | September 17, 2025  | water depth (m)     | 0       | 60.79  | 60.97  | 0.19    | <DL     | 271.44 | <DL    |
| 1                   |                     |                     | 64.43   | 61.20  | 0.15   | <DL     | 273.48  | <DL    | <DL    |
| 3                   |                     |                     | 65.46   | 61.56  | 0.15   | 0.06    | 269.30  | <DL    | <DL    |
| 6                   |                     |                     | 64.94   | 64.28  | 0.13   | 0.13    | 263.79  | <DL    | <DL    |
| 8                   |                     |                     | 63.91   | 63.56  | 0.02   | <DL     | 289.47  | <DL    | <DL    |
| 10                  |                     |                     | 83.63   | 80.07  | 8.24   | <DL     | 336.03  | <DL    | 27.60  |
| 11                  |                     |                     | 88.82   | 86.93  | 20.00  | <DL     | 336.85  | <DL    | 26.03  |
| Sediment depth (cm) |                     | 0                   | 159.77  | 164.53 | 126.34 | <DL     | 416.70  | 115.00 | 54.14  |
| 1                   |                     | 368.07              | 393.88  | 268.81 | 8.87   | 564.98  | 129.13  | 108.25 |        |
| 2                   |                     | 369.39              | 471.62  | 316.26 | <DL    | 699.70  | 138.85  | 127.15 |        |
| 3                   |                     | 698.05              | 862.29  | 591.59 | <DL    | 1408.66 | 333.75  | 287.59 |        |
| 5                   |                     | 705.90              | 848.37  | 652.63 | <DL    | 1467.59 | 345.03  | 288.89 |        |
| 7                   |                     | 690.87              | 855.13  | 716.16 | <DL    | 1967.28 | 480.91  | 320.64 |        |
| 10                  |                     | 653.95              | 792.36  | 707.41 | <DL    | 1894.45 | 449.86  | 310.31 |        |
| November 25, 2025   | water depth (m)     | 0                   | 33.80   | 30.25  | 0.17   | 0.19    | 325.74  | 3.19   | 0.05   |
|                     |                     | 4                   | 34.32   | 29.58  | 0.12   | 0.15    | 305.71  | 4.64   | <DL    |
|                     |                     | 8                   | 36.40   | 30.77  | 0.08   | 0.28    | 306.71  | 1.62   | 0.03   |
|                     |                     | 10                  | 37.95   | 33.06  | 0.10   | 0.20    | 319.19  | 0.41   | 0.34   |
|                     | Sediment depth (cm) | 0                   | 73.94   | 74.42  | 1.00   | <DL     | 322.99  | 91.82  | 17.89  |
|                     |                     | 1                   | 75.73   | 79.13  | 41.61  | <DL     | 258.13  | 67.65  | 34.14  |
|                     |                     | 2                   | 108.35  | 122.56 | 57.05  | <DL     | 287.24  | 75.88  | 43.32  |
|                     |                     | 3                   | 610.58  | 637.58 | 220.50 | <DL     | 612.44  | 150.71 | 111.97 |
|                     |                     | 5                   | 502.87  | 508.22 | 169.62 | <DL     | 467.78  | 104.19 | 84.98  |
|                     |                     | 7                   | 853.37  | 850.72 | 372.10 | <DL     | 842.00  | 199.31 | 152.24 |
|                     |                     | 10                  | 686.09  | 714.82 | 329.51 | <DL     | 1056.14 | 276.52 | 162.66 |

Table S4 Coefficients of determination ( $R^2$ ) for linear regressions between  $D_TSi$  and co-dissolved substances in the South Basin of Lake Biwa pore water under oxic and anoxic conditions.

| Lake Biwa | RSi  | $D_TSi$ | Ca   | Fe   | Al   | Mn   | Mg |
|-----------|------|---------|------|------|------|------|----|
| RSi       | 1    |         |      |      |      |      |    |
| $D_TSi$   | 0.98 | 1       |      |      |      |      |    |
| Ca        | 0.81 | 0.79    | 1    |      |      |      |    |
| Fe        | 0.88 | 0.87    | 0.87 | 1    |      |      |    |
| Al        | 0.51 | 0.52    | 0.37 | 0.50 | 1    |      |    |
| Mn        | 0.89 | 0.89    | 0.94 | 0.93 | 0.50 | 1    |    |
| Mg        | 0.78 | 0.76    | 0.99 | 0.82 | 0.38 | 0.91 | 1  |

Table S5 Dissolved substance data for Lake Okutsu (2018–2019), including D<sub>T</sub>Si, RSi, D<sub>P</sub>Si, and dissolved metal concentrations in water column and sediment pore water.

| Lake Okutsu        | Depth               | RSi | D <sub>T</sub> Si | Fe      | Al                         | Ca    | Mg      | Mn     |        |
|--------------------|---------------------|-----|-------------------|---------|----------------------------|-------|---------|--------|--------|
|                    |                     |     |                   |         | ( $\mu\text{mol L}^{-1}$ ) |       |         |        |        |
| July 28, 2018      | water depth (m)     |     |                   | No data |                            |       |         |        |        |
|                    | Sediment depth (cm) | 0   | 166.99            | 167.68  | 44.44                      | <DL   | 111.12  | 57.05  | 20.16  |
|                    |                     | 1   | 169.41            | 172.70  | 77.43                      | <DL   | 136.67  | 48.51  | 25.72  |
|                    |                     | 3   | 197.40            | 314.15  | 746.04                     | <DL   | 1270.20 | 421.49 | 200.97 |
|                    |                     | 5   | 244.23            | 287.37  | 714.98                     | <DL   | 1184.66 | 401.66 | 192.08 |
|                    |                     | 7   | 281.07            | 290.24  | 642.24                     | <DL   | 1182.36 | 405.95 | 191.90 |
| September 1, 2018  | water depth (m)     | 1   | 209.98            | 213.98  | 1.54                       | <DL   | 93.29   | 34.83  | 0.26   |
|                    |                     | 15  | 150.08            | 160.93  | 13.37                      | 3.75  | 92.14   | 36.30  | 9.06   |
|                    |                     | 17  | 147.05            | 164.26  | 18.26                      | 2.60  | 104.27  | 39.66  | 12.55  |
|                    | Sediment depth (cm) | 0   | 150.67            | 161.49  | 72.98                      | <DL   | 129.66  | 47.86  | 24.65  |
|                    |                     | 1   | 153.87            | 160.83  | 76.91                      | <DL   | 134.59  | 54.18  | 26.28  |
|                    |                     | 3   | 170.84            | 204.62  | 171.22                     | 13.63 | 355.26  | 560.23 | 57.78  |
|                    |                     | 5   | 190.72            | 231.75  | 696.40                     | <DL   | 1304.78 | 534.64 | 233.06 |
| April 28, 2019     | water depth (m)     | 0   | 209.73            | 212.11  | <DL                        | <DL   | 61.91   | 24.24  | <DL    |
|                    |                     | 4   | 210.66            | 213.31  | <DL                        | <DL   | 61.02   | 23.58  | <DL    |
|                    |                     | 8   | 221.86            | 225.90  | <DL                        | <DL   | 62.68   | 23.96  | <DL    |
|                    |                     | 12  | 226.53            | 219.70  | <DL                        | <DL   | 60.76   | 24.14  | <DL    |
|                    |                     | 16  | 221.86            | 225.25  | <DL                        | <DL   | 65.43   | 25.41  | <DL    |
|                    |                     | 17  | 226.53            | 224.74  | <DL                        | <DL   | 64.13   | 25.43  | 0.06   |
|                    | Sediment depth (cm) | 0   | 215.61            | 222.08  | 4.63                       | <DL   | 60.91   | 21.27  | 5.28   |
|                    |                     | 1   | 508.75            | 518.43  | 130.46                     | <DL   | 242.30  | 35.35  | 16.47  |
|                    |                     | 3   | 245.97            | 248.27  | 21.85                      | <DL   | 48.15   | <DL    | <DL    |
|                    |                     | 5   | 443.47            | 449.93  | 305.89                     | <DL   | 390.57  | 89.60  | 45.38  |
|                    |                     | 7   | 482.77            | 516.78  | 349.72                     | <DL   | 528.36  | 149.38 | 64.18  |
|                    |                     | 10  | 658.16            | 689.74  | 430.16                     | 1.30  | 778.73  | 187.39 | 80.58  |
| August 31, 2019    | water depth (m)     | 0   | 227.54            | 230.97  | 1.18                       | <DL   | 105.97  | 36.73  | 0.19   |
|                    |                     | 1   | 222.36            | 222.41  | 1.08                       | <DL   | 101.34  | 35.09  | 0.16   |
|                    |                     | 5   | 219.77            | 220.79  | 1.80                       | <DL   | 98.62   | 34.27  | 0.24   |
|                    |                     | 11  | 219.77            | 217.44  | 4.49                       | 0.49  | 104.30  | 37.06  | 0.93   |
|                    |                     | 16  | 183.48            | 205.66  | 23.05                      | <DL   | 120.17  | 41.69  | 10.35  |
|                    |                     | 19  | 180.89            | 202.56  | 29.20                      | <DL   | 123.65  | 41.93  | 12.77  |
|                    | Sediment depth (cm) | 0   | 209.40            | 209.12  | 11.94                      | <DL   | 107.86  | 36.05  | 8.75   |
|                    |                     | 1   | 209.40            | 207.85  | 58.85                      | <DL   | 80.34   | 25.07  | 10.68  |
|                    |                     | 3   | 297.52            | 363.10  | 285.70                     | 5.76  | 433.84  | 92.89  | 44.10  |
|                    |                     | 5   | 383.04            | 438.47  | 541.11                     | 11.45 | 696.25  | 188.58 | 81.92  |
|                    |                     | 7   | 800.31            | 910.49  | 896.18                     | 44.15 | 1419.34 | 338.73 | 157.20 |
|                    |                     | 10  | 870.29            | 1018.31 | 1340.86                    | 76.86 | 1844.38 | 590.51 | 248.20 |
| September 14, 2019 | water depth (m)     | 0   | 219.65            | 227.68  | 0.86                       | 0.52  | 101.61  | 35.24  | 0.52   |
|                    |                     | 5   | 216.97            | 235.57  | 2.06                       | <DL   | 102.95  | 36.09  | 0.31   |
|                    |                     | 10  | 211.61            | 231.97  | 4.71                       | 0.43  | 105.32  | 36.88  | 0.88   |
|                    |                     | 15  | 179.48            | 201.49  | 23.42                      | <DL   | 119.38  | 41.15  | 9.06   |
|                    |                     | 19  | 190.19            | 199.09  | 43.51                      | <DL   | 125.31  | 41.37  | 11.62  |
|                    | Sediment depth (cm) | 0   | 198.22            | 238.93  | 62.21                      | <DL   | 128.02  | 31.29  | 12.79  |
|                    |                     | 1   | 190.19            | 226.21  | 87.13                      | <DL   | 103.83  | 30.61  | 15.25  |
|                    |                     | 3   | 275.88            | 440.96  | 560.80                     | 10.04 | 567.53  | 116.45 | 111.00 |
|                    |                     | 5   | 337.48            | 447.44  | 694.65                     | 9.36  | 724.03  | 158.99 | 127.30 |
|                    |                     | 7   | 267.85            | 462.81  | 710.94                     | 1.59  | 761.96  | 176.75 | 135.78 |
|                    |                     | 10  | 273.20            | 354.42  | 728.63                     | 1.75  | 1032.69 | 290.43 | 137.22 |

Table S6 Coefficients of determination ( $R^2$ ) for linear regressions between  $D_T\text{Si}$  and co-dissolved substances in Lake Okutsu pore water under oxic and anoxic conditions.

| Lake Okutsu    | RSi  | $D_T\text{Si}$ | Ca   | Fe   | Al   | Mn   | Mg |
|----------------|------|----------------|------|------|------|------|----|
| RSi            | 1    |                |      |      |      |      |    |
| $D_T\text{Si}$ | 0.97 | 1              |      |      |      |      |    |
| Ca             | 0.56 | 0.65           | 1    |      |      |      |    |
| Fe             | 0.59 | 0.71           | 0.96 | 1    |      |      |    |
| Al             | 0.78 | 0.81           | 0.84 | 0.78 | 1    |      |    |
| Mn             | 0.36 | 0.47           | 0.96 | 0.93 | 0.79 | 1    |    |
| Mg             | 0.30 | 0.36           | 0.84 | 0.75 | 0.69 | 0.85 | 1  |
